# Supplementary material for: Improving the Accuracy of a Clinical Decision Support System for Cervical Cancer Screening and Surveillance
Source: PubMed Central journal article supplement — Appl Clin Inform. 2018 Jan 24;9(1):62–71. doi: 10.1055/s-0037-1617451 (PMC5801884; doi:10.1055/s-0037-1617451), 2018-01-24
Supplement: 10-1055-s-0037-1617451-s170119ra-1.pdf [file 10-1055-s-0037-1617451-s170119ra-1.pdf]

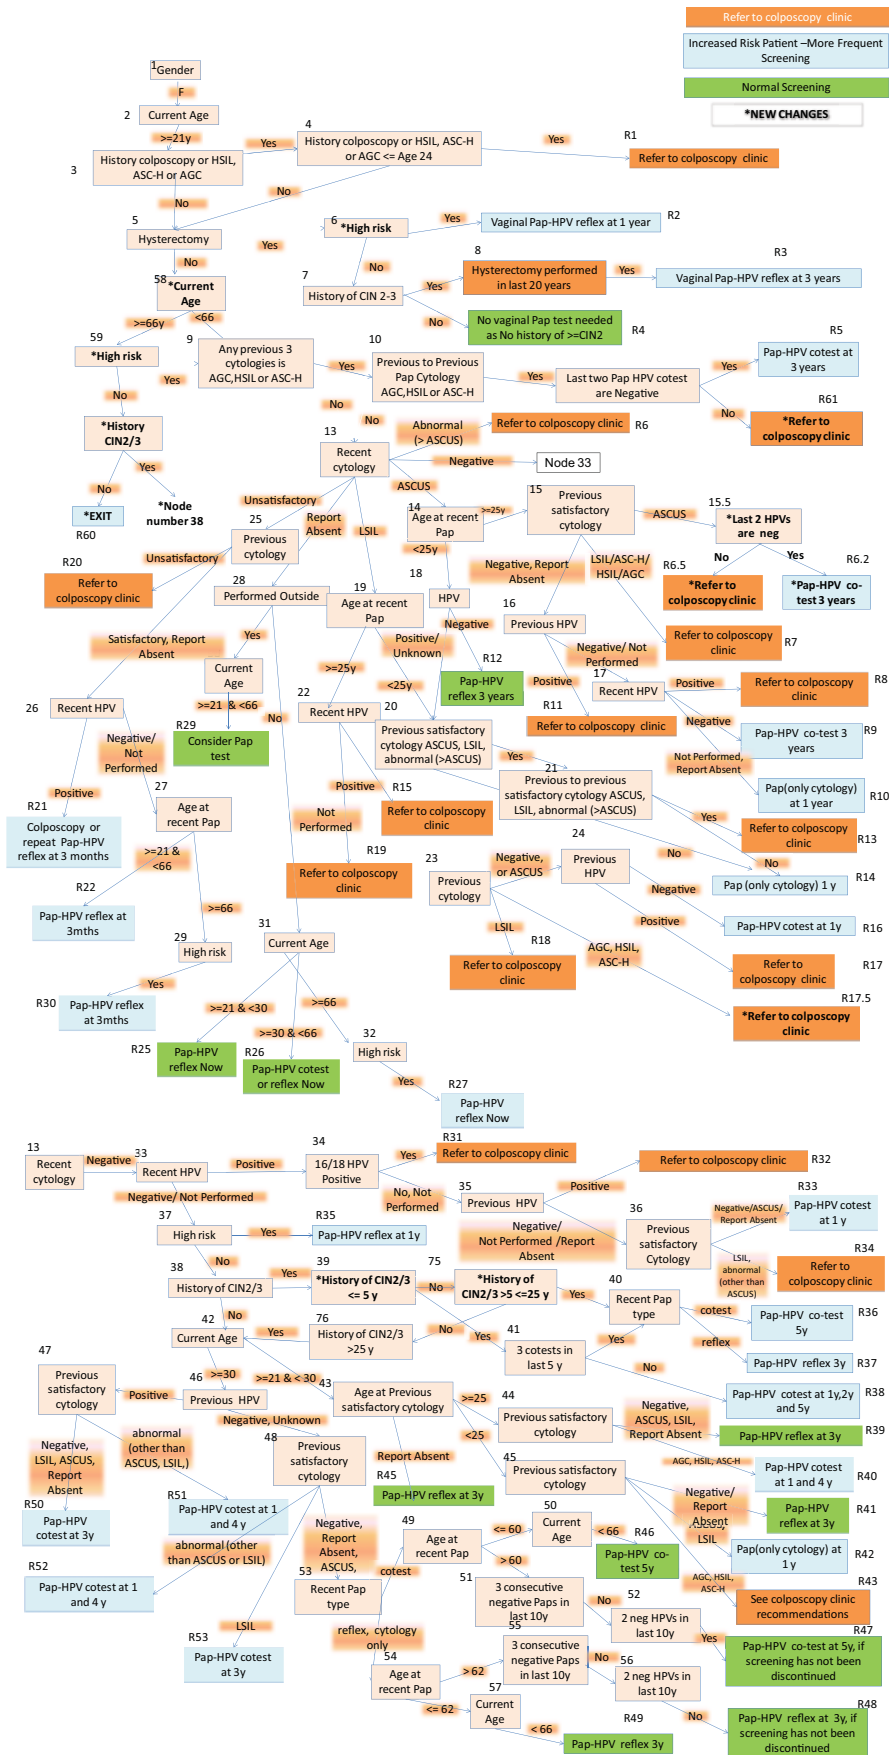

Supplementary Fig. S1 Computational workflow for cervical cancer surveillance and screening after ASCCP guidelines update.
