# Supplementary material for: Improving the Accuracy of a Clinical Decision Support System for Cervical Cancer Screening and Surveillance
Source: PubMed Central journal article supplement — Appl Clin Inform. 2018 Jan 24;9(1):62–71. doi: 10.1055/s-0037-1617451 (PMC5801884; doi:10.1055/s-0037-1617451), 2018-01-24
Supplement: 10-1055-s-0037-1617451-s170119ra-2.pdf [file 10-1055-s-0037-1617451-s170119ra-2.pdf]

**Supplementary Table S1** Percentage sample selected from each population (strata)

| Decision end point | No. of patients | No. of patients sampled | Percentage sample |
|--------------------|-----------------|-------------------------|-------------------|
| R12                | 40              | 4                       | 10.0              |
| R14                | 31              | 3                       | 9.7               |
| R15                | 47              | 5                       | 10.6              |
| R16                | 1               | 1                       | 100.0             |
| R18                | 5               | 2                       | 40.0              |
| R19                | 58              | 6                       | 10.3              |
| R20                | 15              | 2                       | 13.3              |
| R23                | 96              | 10                      | 10.4              |
| R25                | 124             | 12                      | 9.7               |
| R26                | 69              | 7                       | 10.1              |
| R27                | 11              | 1                       | 9.1               |
| R28                | 174             | 17                      | 9.8               |
| R29                | 52              | 5                       | 9.6               |
| R33                | 58              | 6                       | 10.3              |
| R35                | 19              | 2                       | 10.5              |
| R39                | 263             | 26                      | 9.9               |
| R4                 | 717             | 70                      | 9.8               |
| R41                | 112             | 11                      | 9.8               |
| R42                | 110             | 11                      | 10.0              |
| R45                | 167             | 17                      | 10.2              |
| R46                | 843             | 83                      | 9.8               |
| R47                | 5               | 5                       | 100.0             |
| R48                | 151             | 16                      | 10.6              |
| R49                | 326             | 34                      | 10.4              |
| R5                 | 2               | 2                       | 100.0             |
| R52                | 5               | 5                       | 100.0             |
| R6                 | 76              | 8                       | 10.5              |
| R7                 | 3               | 3                       | 100.0             |
| R8                 | 8               | 7                       | 87.5              |
| R9                 | 116             | 12                      | 10.3              |
|                    | 3704            | 393                     | 10.6              |
